# Supplementary material for: Precipitation of vanadium from leachate solutions by reduction with hydrazine
Source: Royal Society of Chemistry journal article supplement (doi:10.1039/d6ra02758j), 2026-04-17
Supplement: d6ra02758j1.pdf [file d6ra02758j1.pdf]

**Supporting information for:**

**Precipitation of vanadium from leachate solutions by reduction with hydrazine**

Aston C. Percy,<sup>a,c</sup> Brooke L. Matthews,<sup>a,c</sup> Aaron T. Marshall<sup>b,c</sup> and Chris W. Bumby<sup>\*a,c</sup>

<sup>a</sup>*Robinson Research Institute, Victoria University of Wellington, Lower Hutt, New Zealand.*

<sup>b</sup>*Department of Chemical and Process Engineering, University of Canterbury, Christchurch, New Zealand.*

<sup>c</sup>*The MacDiarmid Institute for Advanced Materials and Nanotechnology, Victoria University of Wellington, Wellington, New Zealand.*

## Table of contents

|     |                                                                                     |    |
|-----|-------------------------------------------------------------------------------------|----|
| 1   | Appearance of colloidal suspension at different pH values .....                     | 3  |
| 2   | Zeta potential measurement .....                                                    | 3  |
| 3   | Particle size analysis of samples .....                                             | 4  |
| 4   | Ripening of nano-colloidal solution using a flocculant .....                        | 5  |
| 5   | Relationship between initial leachate parameters and precipitation efficiency ..... | 5  |
| 6   | Additional TEM images .....                                                         | 6  |
| 7   | 'Green chemistry' metrics calculations.....                                         | 8  |
| 7.1 | E-factor .....                                                                      | 8  |
| 7.2 | Atom economy .....                                                                  | 9  |
| 7.3 | Reaction mass efficiency.....                                                       | 9  |
| 8   | References .....                                                                    | 10 |

## 1 Appearance of colloidal suspension at different pH values

Sulfuric acid was added to a solution of the nano-colloid formed from reduction of a pure  $V^{5+}$  solution. Observations were recorded at each measured pH.

**Table S1.** Observations when adding sulfuric acid to the black nano-colloid.

| pH   | Observation                          |
|------|--------------------------------------|
| 3.56 | Dark blue/green transparent solution |
| 5.58 | Dark solution with black precipitate |
| 6.50 | Dark solution with black precipitate |
| 7.64 | Dark solution with black precipitate |
| 8.66 | Dark solution with black precipitate |
| 9.65 | Initial agglomerated solution        |

## 2 Zeta potential measurement

Distilled water was filtered twice through a 0.45  $\mu\text{m}$  nylon membrane. This twice filtered distilled water was used as the dispersant for the zeta potential measurement.

|                                    | Mean (mV)            | Area (%) | St Dev (mV) |
|------------------------------------|----------------------|----------|-------------|
| <b>Zeta Potential (mV): -14.0</b>  | <b>Peak 1: -14.0</b> | 100.0    | 7.49        |
| <b>Zeta Deviation (mV): 7.49</b>   | <b>Peak 2: 0.00</b>  | 0.0      | 0.00        |
| <b>Conductivity (mS/cm): 0.564</b> | <b>Peak 3: 0.00</b>  | 0.0      | 0.00        |

**Result quality Good**

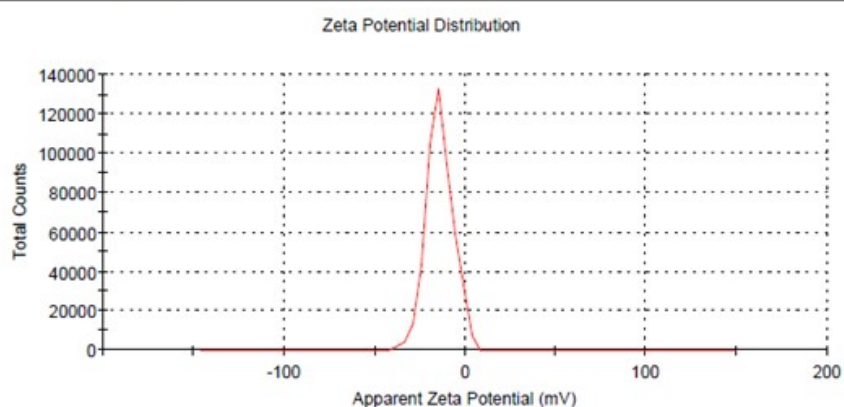

**Figure S1.** Zeta potential measurement of the black nano-colloidal solution obtained after reduction of AC leachate with hydrazine.

### 3 Particle size analysis of samples

Distilled water was filtered twice through a 0.45  $\mu\text{m}$  nylon membrane. This twice filtered distilled water was used as the dispersant for the particle size analyses.

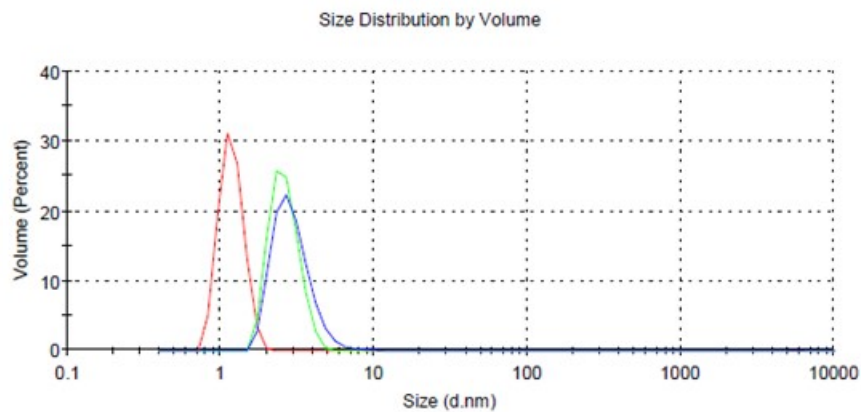

**Figure S2.** Particle size measurements (3 replicates, volume distribution) of the black solution obtained after reduction of AC leachate.

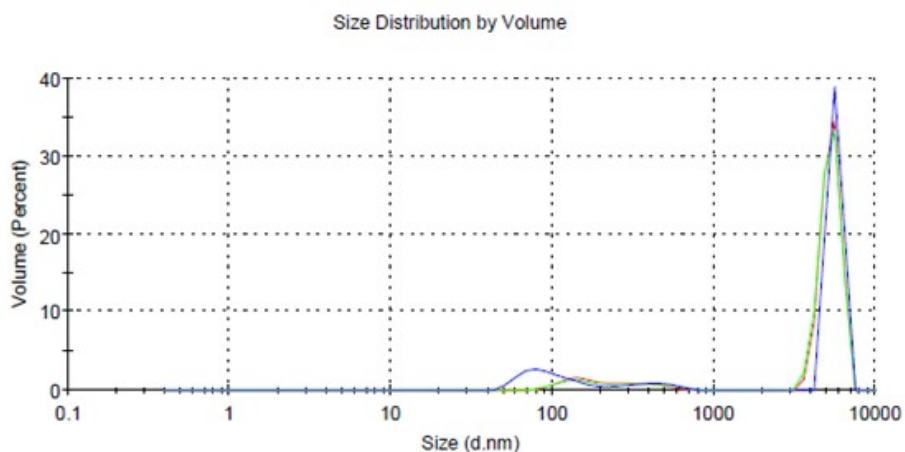

**Figure S3.** Particle size measurements (3 replicates, volume distribution) of the agglomerated black solution obtained after reduction of AC leachate.

#### 4 Ripening of nano-colloidal solution using a flocculant

Flocculant PK 311 (1 g) was added to distilled water (1 L) and stirred vigorously overnight at RT. A small amount of the stock flocculant solution (0.1 mL) was added to reduced AC leachate (50 mL) and stirred for 5 minutes before being allowed to sit for 10 minutes. After this time, a sample of this solution was taken and analysed.

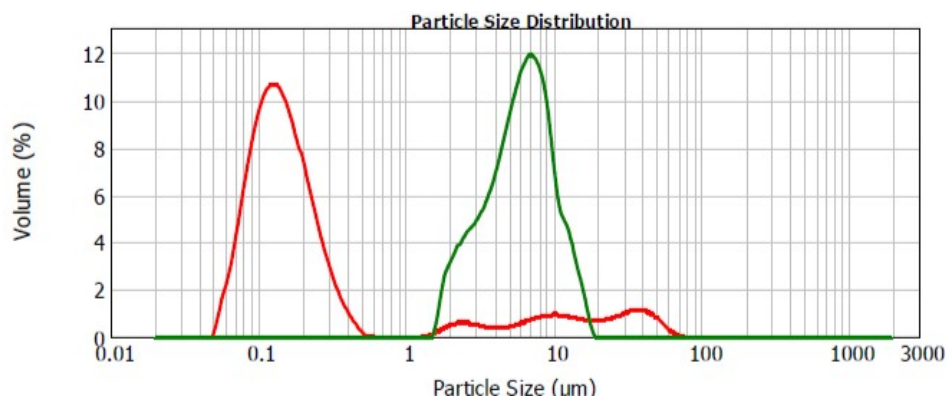

**Figure S4.** Particle size distribution of the initial black colloidal solution (red curve), and the black solution after the addition of the flocculant PK 311 (green curve).

#### 5 Relationship between initial leachate parameters and precipitation efficiency

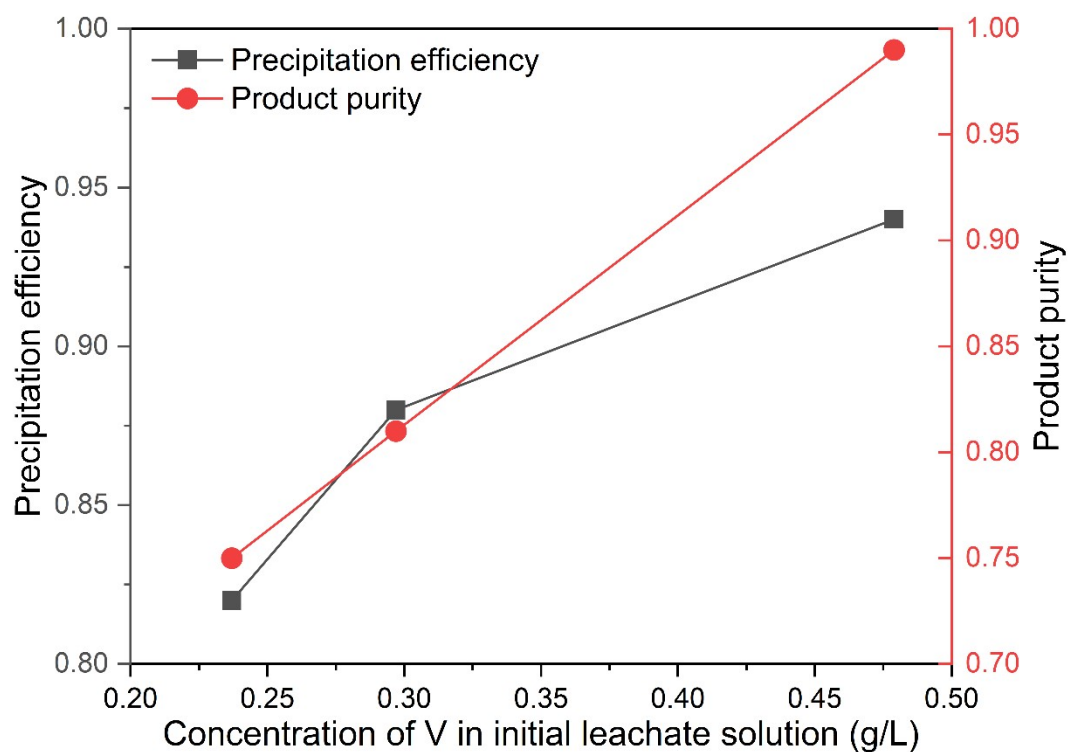

**Figure S5.** Plot showing the relationship between the concentration of vanadium in the initial leachate solution, and the precipitation efficiency and product purity achieved.

## 6 Additional TEM images

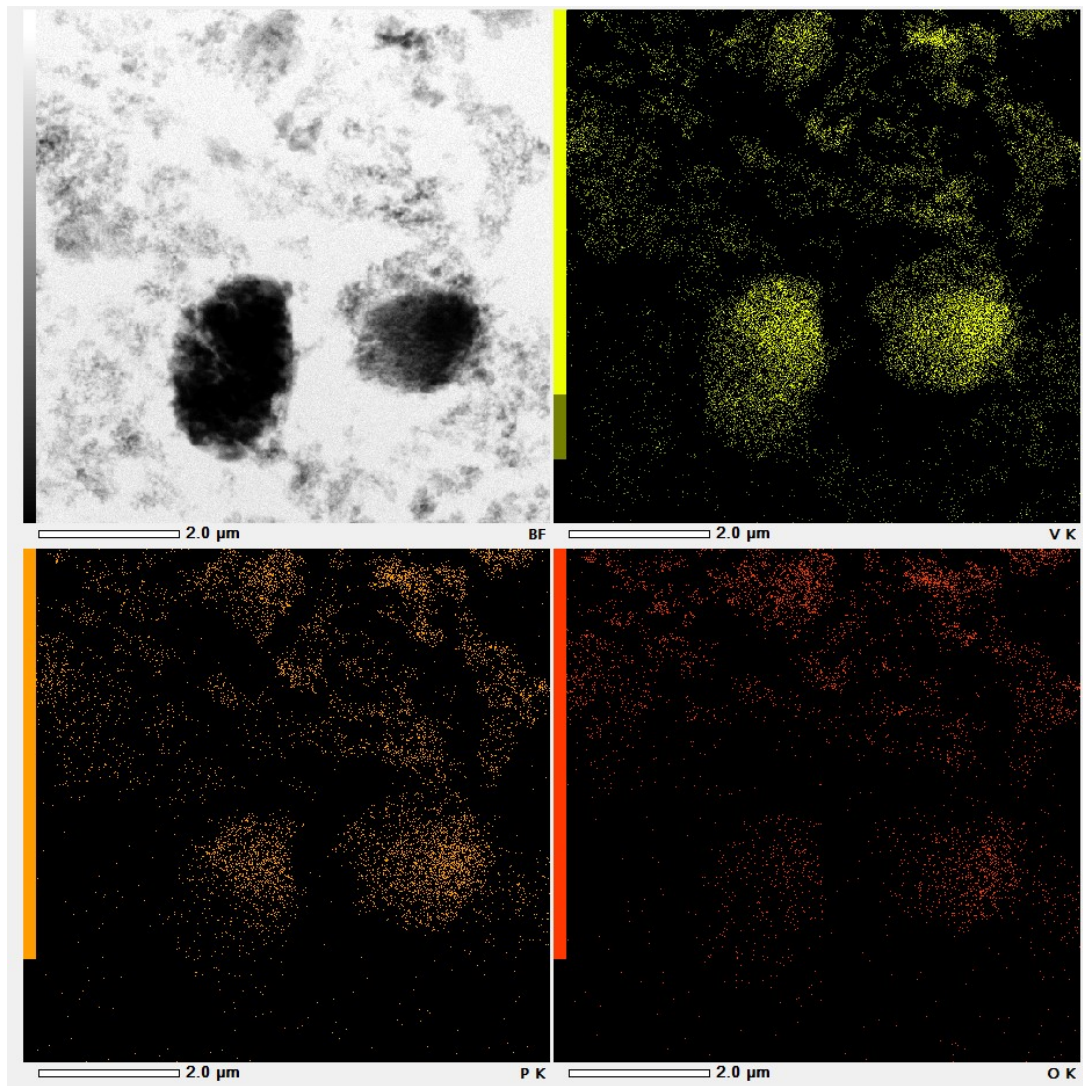

**Figure S6.** TEM/EDS map (20k magnification) of agglomerated nanoparticles from AC leachate reduction. Top left: bright field image of the black precipitate, top right: vanadium distribution, bottom left: phosphorus distribution, bottom right: oxygen distribution.

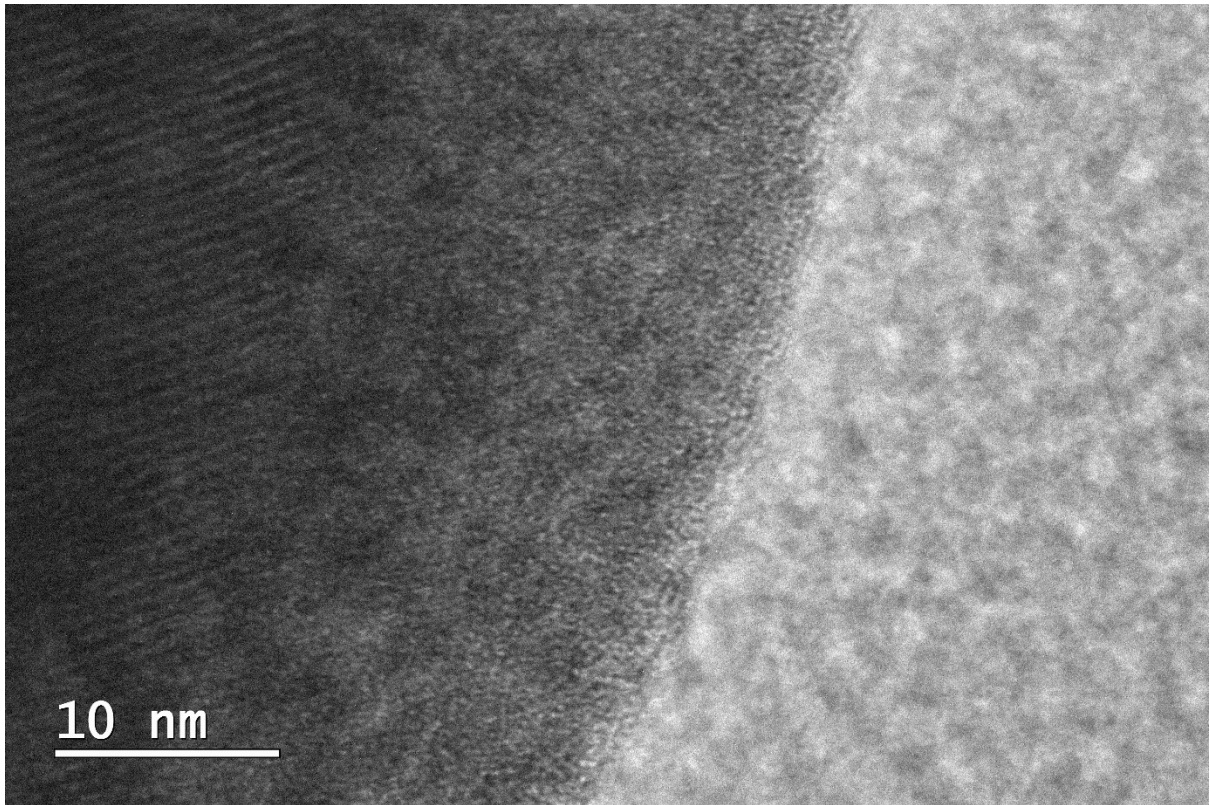

**Figure S7.** TEM image of agglomerated cylindrical nanorods from pure  $V^{5+}$  solution post-agglomeration (500k magnification).

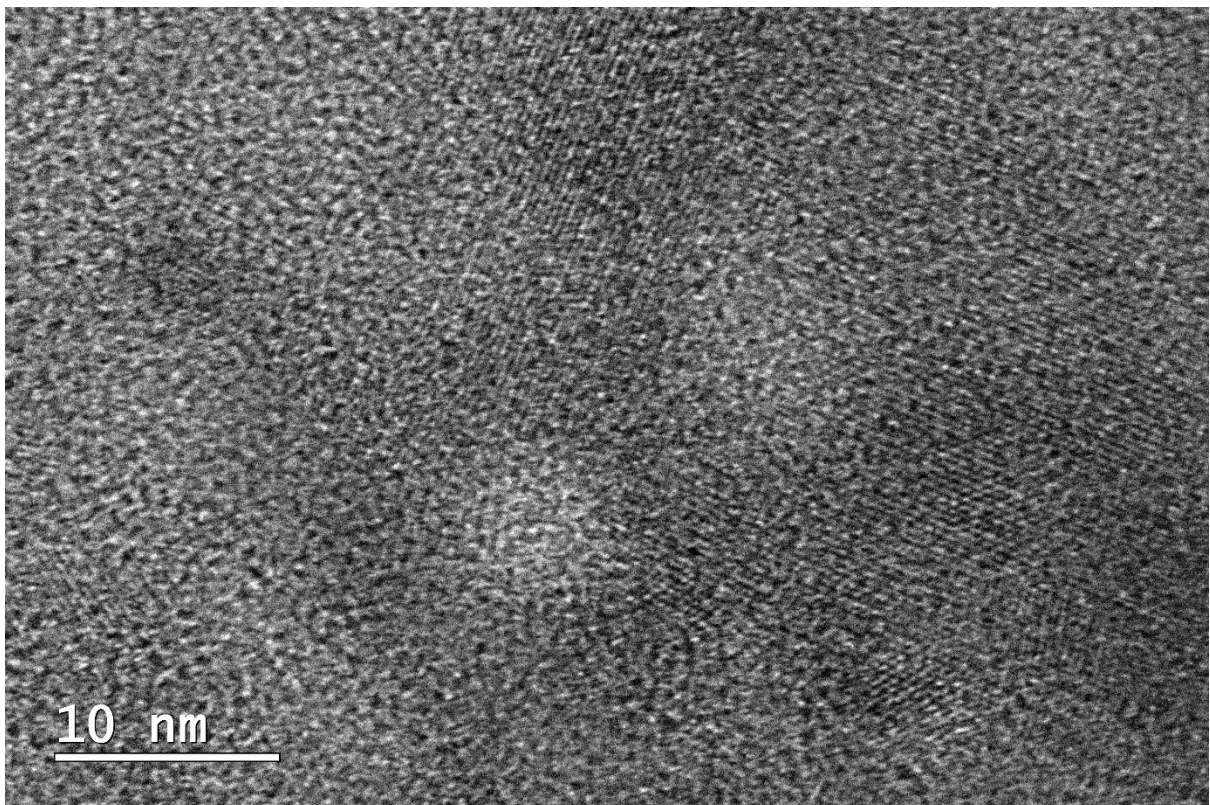

**Figure S8.** Pre-agglomeration nanoparticles from AC leachate reduction (500k magnification).

## 7 “Green Chemistry” metrics calculations

### E-factor calculations

The *E-factor* describes the environmental acceptability of a process through comparison of the mass of waste generated with the mass of product formed in the process. The *E-factor* is defined as follows:

$$E \text{ factor} = \frac{m_{\text{waste}}}{m_{\text{product}}}$$

Where  $m_{\text{waste}}$  is defined as the total mass of the process waste, and  $m_{\text{product}}$  is defined as the total mass of the process product. The *E-factor* of the hydrazine precipitation step was calculated and compared to the conventional ammonium-salt precipitation route.

The precipitation method with hydrazine proposed here allows for the formation of solid  $V_2O_3$ ,  $H_2O$ , and  $N_2$  and  $NH_3$  as gases that can be recaptured and recycled back into the process:

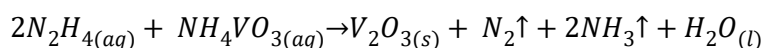

As this process leaves behind clean water and gases that can be recaptured and recycled,  $m_{\text{waste}} = 0$ , therefore:

$$E \text{ factor} = \frac{0}{m_{\text{product}}} = 0$$

By contrast, the conventional ammonium-salt precipitation route typically involves the addition of a large excess of ammonium chloride (2-10 equivalents) to a sodium vanadate solution while heating. This gives ammonium vanadate as a product, while generating contaminated wastewater as a byproduct.

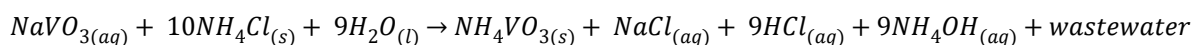

The parameters used for the calculation of the *E-factor* for the ammonium chloride precipitation process are shown in tables S2 and S3 below. A theoretical V solution concentration of 1000 ppm was assumed, with contaminated, unrecyclable wastewater included in the waste mass calculation. Literature examples give the excess of ammonium chloride required as between 2 and 10 equivalents, resulting in the *E-factor* here being calculated as a range.<sup>1,2</sup>

**Table S2.** Lower bound parameters for E-factor calculations for ammonium chloride precipitation.

|                      | Reagents          |                    | Products                        |                 |       |       |             |
|----------------------|-------------------|--------------------|---------------------------------|-----------------|-------|-------|-------------|
|                      | NaVO <sub>3</sub> | NH <sub>4</sub> Cl | NH <sub>4</sub> VO <sub>3</sub> | NH <sub>3</sub> | HCl*  | NaCl* | Wastewater* |
| Molar Equivalents    | 1                 | 2                  | 1                               | 1               | 1     | 1     |             |
| Mol/t                | 19.63             | 39.26              | 19.63                           | 19.63           | 19.63 | 19.63 |             |
| Molar mass (g/mol)   | 121.93            | 53.49              | 116.98                          | 17.03           | 36.46 | 58.44 |             |
| Mass (kg/t leachate) | 2.39              | 2.10               | 2.30                            | 0.33            | 0.72  | 1.15  | 1000000     |

\*Products are considered to be waste for calculations as regeneration is cost prohibitive and usually not done.

**Table S3.** Upper bound parameters for E-factor calculations for ammonium chloride precipitation.

|                      | Reagents          |                    | Products                        |                 |         |       |             |
|----------------------|-------------------|--------------------|---------------------------------|-----------------|---------|-------|-------------|
|                      | NaVO <sub>3</sub> | NH <sub>4</sub> Cl | NH <sub>4</sub> VO <sub>3</sub> | NH <sub>3</sub> | HCl*    | NaCl* | Wastewater* |
| Molar Equivalents    | 1                 | 10                 | 1                               | 9               | 9       | 1     |             |
| Mol/t                | 19.63             |                    | 19.63                           | 176.67          | 176.67  | 19.63 |             |
| Molar mass (g/mol)   | 121.93            |                    | 116.98                          | 17.03           | 36.46   | 58.44 |             |
| Mass (kg/t leachate) | 2.39              |                    | 2.30                            | 3008.92         | 6441.51 | 1.15  | 1000000     |

\*Products are considered to be waste for calculations as regeneration is cost prohibitive and usually not done.

Using these parameters results in the following *E-factor* calculations for the lower and upper bounds:

$$E \text{ Factor} = \frac{1.007589}{0.002293} = 436.3$$

$$E \text{ Factor} = \frac{1.007589}{0.002296} = 438.8$$

### Atom economy calculations

*Atom economy* is a measure of the chemical efficiency of a process, whereby the proportion of atoms from the starting mixture that are incorporated into the final product are calculated. *Atom economy* is expressed as below:

$$\%AE = \frac{M_{product}}{M_{total}} \times 100$$

Where  $M_{product}$  is the molar mass of the product, and  $M_{total}$  is the sum of the molar masses of all reagents. The parameters used for the atom economy calculations and the atom economies of the proposed hydrazine precipitation pathway and the conventional ammonium-salt precipitation process are shown in table S4.

**Table S4.** Atom economy calculations for the discussed precipitation pathways.

| Process                                             | $m_{product}$ | $m_{total}$ | %AE |
|-----------------------------------------------------|---------------|-------------|-----|
| Ammonium chloride precipitation (lower equivalent)  | 116.98        | 228.91      | 51% |
| Ammonium chloride precipitation (higher equivalent) | 116.98        | 656.84      | 18% |
| Hydrazine precipitation (lower equivalent)          | 149.03        | 82.94       | 56% |
| Hydrazine precipitation (higher equivalent)         | 149.88        | 266.01      | 56% |

## Reaction mass efficiency calculations

Reaction mass efficiency is a measure of how efficiently the reaction has converted starting materials into product, taking into account both atom economy and percentage yield of the process. Reaction mass efficiency values for the conventional ammonium-salt precipitation process and the proposed hydrazine precipitation are presented in table S5 below, along with a summary comparison of the two processes.

**Table S5.** Summary comparison of green metric calculations between the conventional ammonium-salt pathway and the reductive hydrazine pathway.

| Parameter                | Conventional ammonium-salt precipitation | Reductive hydrazine precipitation |
|--------------------------|------------------------------------------|-----------------------------------|
| Reagent consumption      | 2-10 molar equivalents                   | 1.5 molar equivalents             |
| Precipitation efficiency | 99%                                      | 82-94%                            |
| Product purity           | 98-99%                                   | 75-99%                            |
| Recyclable wastewater    | No                                       | Yes                               |
| E-factor                 | 436-439                                  | 0                                 |
| Atom economy             | 18-51%                                   | 56%                               |
| Reaction mass efficiency | 17-51%                                   | 46-52%                            |

## 8 References

1. P. Xiong, Y. Zhang, S. Bao and J. Huang, *Hydrometallurgy*, 2018, **180**, 113-120.
2. G. Lin, J. Huang, Y. Zhang and P. Hu, *Materials*, 2022, **15**, 1945-1959.
